# Supplementary material for: AMPK regulates lipid accumulation in skeletal muscle cells through FTO-dependent demethylation of N6-methyladenosine
Source: PubMed Central journal article supplement (PMC5296945; doi:10.1038/srep41606), 2017-02-08
Supplement: srep41606-s1.pdf [file srep41606-s1.pdf]

**AMPK regulates lipid accumulation in skeletal muscle cells through**

**FTO-dependent demethylation of *N*<sup>6</sup>-methyladenosine**

Weiche Wu<sup>1</sup>, Jie Feng<sup>1</sup>, Denghu Jiang<sup>1</sup>, Xihong Zhou<sup>2</sup>, Qin Jiang<sup>1</sup>, Min Cai<sup>1</sup>, Xinxia Wang<sup>1</sup>, Tizhong Shan<sup>1\*</sup>, Yizhen Wang<sup>1\*</sup>

<sup>1</sup> College of Animal Science, Zhejiang University; Key Laboratory of Animal Nutrition & Feed Sciences, Ministry of Agriculture; Zhejiang Provincial Laboratory of Feed and Animal Nutrition; No. 866 Yuhangtang Road, Hangzhou, Zhejiang, 310058, P. R. China

<sup>2</sup> Institute of Subtropical Agriculture, The Chinese Academy of Science, Changsha, Hunan 410125, P. R. China

**\*Corresponding author:**

Email: tzshan@zju.edu.cn, yzwan321@zju.edu.cn

Fax: +86-0571-88982729

Tel.: +86-0571-88982729

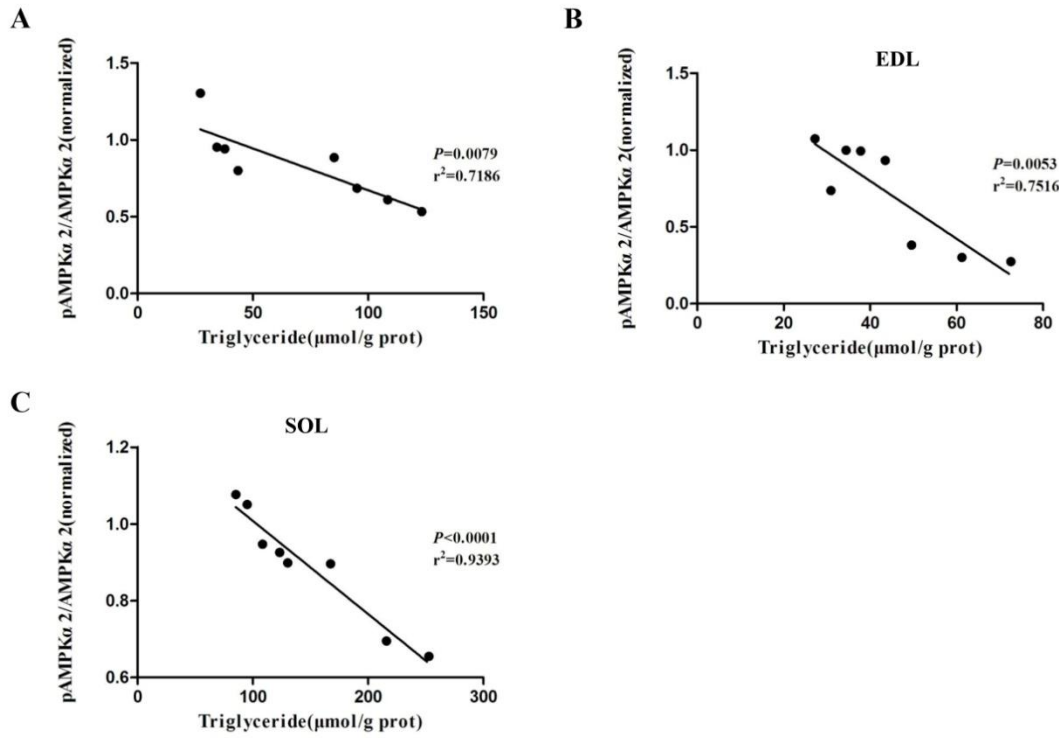

### Supplemental Figure 1

**Correlation between pAMPK levels and triglyceride content in muscle. (A)**

Correlation in the EDL and SOL of WT mice. (B, C) Correlation in the EDL (B) and SOL (C) of WT and OB mice. P value and R squared are presented in the graphs.

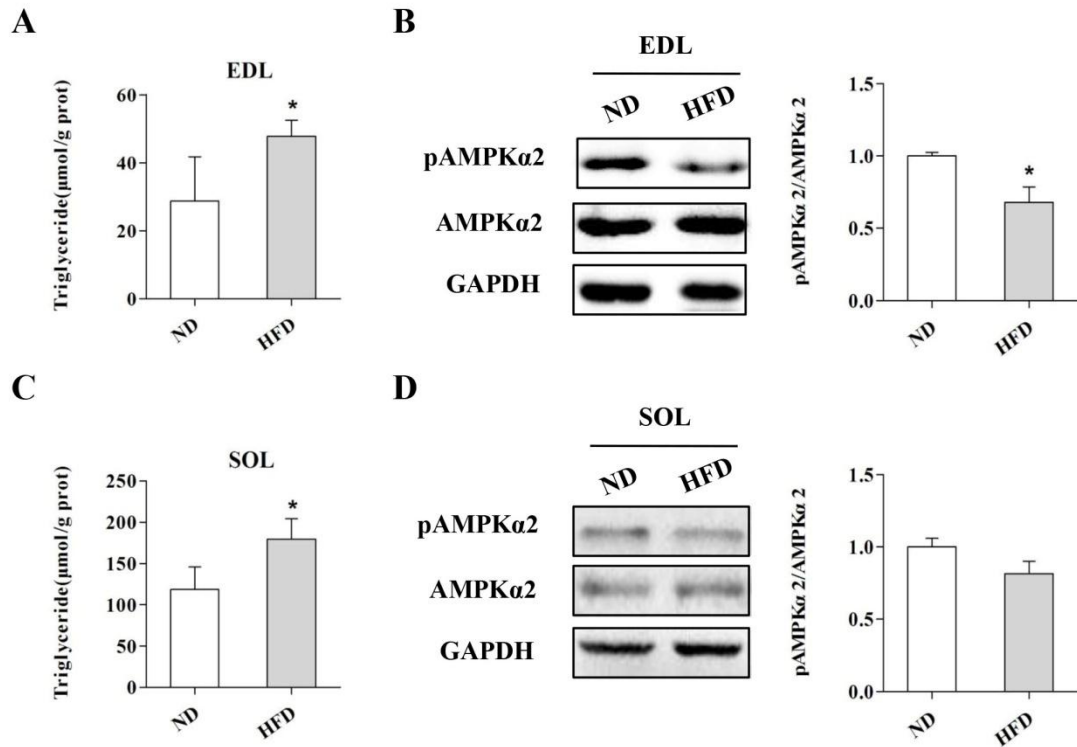

### Supplemental Figure 2

**The expression of AMPK in skeletal muscle is inversely correlated with lipid content.**(A) The triglyceride content in the EDL of the HFD group and ND group.(B) The p-AMPKα2 levels in the EDL of the HFD group and ND group. (C) The triglyceride content in the SOL of the HFD group and the ND group.(D) The p-AMPKα2 levels in the SOL of the HFD group and ND group. The results are presented as the mean ± SEM. n=4-6. \* $p < 0.05$ .

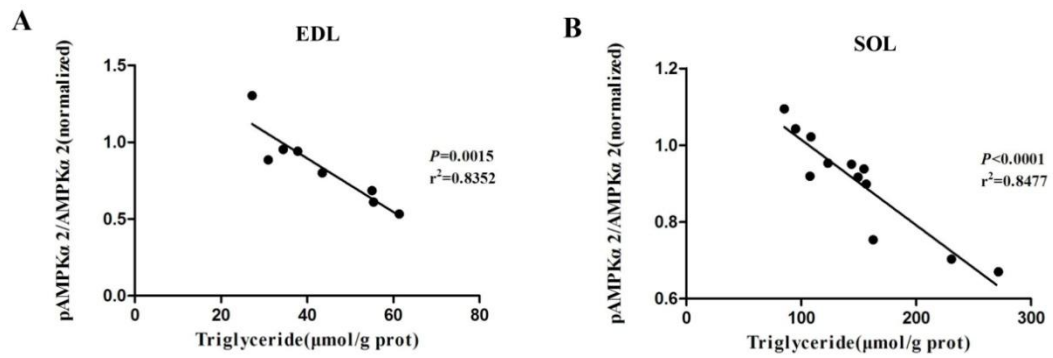

### Supplemental Figure 3

**Correlation analysis between pAMPK levels and triglyceride content in the EDL and SOL of ND- and HFD- fed mice. (A)Correlation in EDL. (B) Correlation in SOL. P value and R squared are presented in the graphs.**

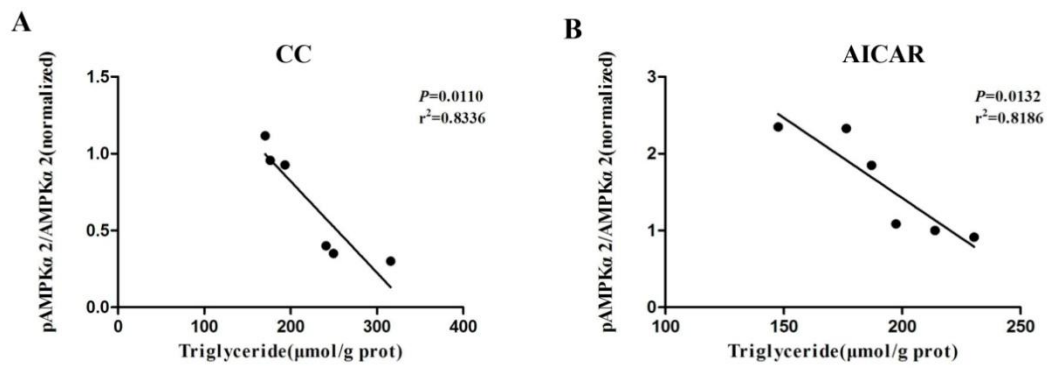

#### Supplemental Figure 4

Correlation between pAMPK levels and triglyceride content in C2C12 cells.

(A) Correlation in the Vehicle and CC groups. (B) Correlation in the Vehicle and AICAR groups. P value and R squared are presented in the graphs.

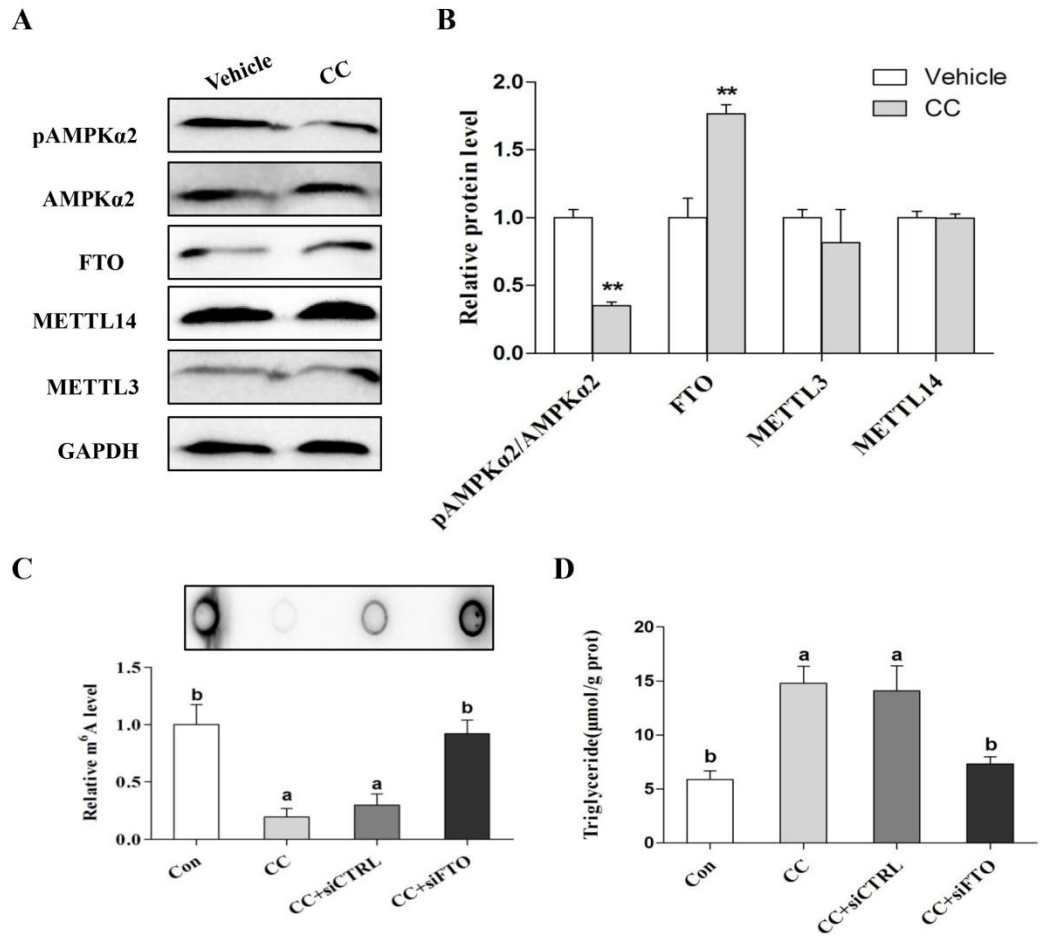

### Supplemental Figure 5

**Compound C upregulates FTO expression and decreases m<sup>6</sup>A methylation in C2C12 cells.**(A, B) The protein levels of p-AMPKα2, AMPKα2, FTO, METTL3 and METTL14 in C2C12 cells after CC treatment. (C, D) m<sup>6</sup>A methylation (C) and the triglyceride content (D) after combined treatment with CC and siFTO. Data are presented as the mean ± SEM. n=3. \**p*< 0.05, \*\* *p*< 0.01.
